# Supplementary material for: Relation Between Circulating Inflammatory Chemokines and Vascular Characteristics in Healthy, Young Children
Source: PubMed Central journal article supplement — J Am Heart Assoc. 2015 Dec 16;4(12):e002346. doi: 10.1161/JAHA.115.002346 (PMC4845277; doi:10.1161/jaha.115.002346), 2015-12-16
Supplement: JAH3-4-e002346-s001.pdf [file JAH3-4-e002346-s001.pdf]

**SUPPLEMENTAL MATERIAL**

**Table S1. Comparison of demographic study parameters between participating (1) and non-participating (0) subjects of the WHISTLER cohort**

| Study parameter                                          | Participating† | N†  | n (%)                 | P§   |
|----------------------------------------------------------|----------------|-----|-----------------------|------|
|                                                          |                |     | Mean +/- SD*          |      |
|                                                          |                |     | Median (Q1, Q3)*      |      |
| <b>Age (years)</b>                                       | 0              | 98  | 8.11 ± 0.41           | 0.66 |
|                                                          | 1              | 139 | 8.12 ± 0.42           |      |
| <b>Sex</b>                                               | 0 / 1          |     | 40 (40.8) / 59 (42.4) | 0.91 |
|                                                          | - boy          |     |                       |      |
|                                                          | 0 / 1          |     | 58 (59.2) / 80 (57.6) |      |
| <b>Height (cm)</b>                                       | 0              | 98  | 132.1 ± 6.8           | 0.64 |
|                                                          | 1              | 139 | 132.5 ± 5.4           |      |
| <b>Weight (kg)</b>                                       | 0              | 98  | 27.95 ± 5.26          | 0.88 |
|                                                          | 1              | 139 | 28.04 ± 4.37          |      |
| <b>BMI (kg/m<sup>2</sup>)*</b>                           | 0              | 98  | 15.90 ± 1.91          | 0.93 |
|                                                          | 1              | 139 | 15.91 ± 1.75          |      |
| <b>Waist Circumference (cm)</b>                          | 0              | 98  | 58.19 ± 5.33          | 0.64 |
|                                                          | 1              | 139 | 58.31 ± 5.00          |      |
| <b>SBP (mmHg)*</b>                                       | 0              | 98  | 106.0 ± 7.0           | 0.25 |
|                                                          | 1              | 139 | 107.0 ± 9.0           |      |
| <b>DBP (mmHg)*</b>                                       | 0              | 98  | 56.0 ± 6.0            | 0.91 |
|                                                          | 1              | 139 | 55.0 ± 6.0            |      |
| <b>Common CIMT (mm)*</b>                                 | 0              | 98  | 0.38 (0.35, 0.40)     | 0.60 |
|                                                          | 1              | 139 | 0.38 (0.35, 0.41)     |      |
| <b>Common Carotid Distensibility (MPA<sup>-1</sup>)*</b> | 0              | 96  | 84.66 (67.90, 97.27)  | 0.46 |

|                                  |   |     |                         |      |
|----------------------------------|---|-----|-------------------------|------|
|                                  | 1 | 131 | 85.65 (71.44, 97.71)    |      |
| <b>Common Carotid YEM (kPa)*</b> | 0 | 96  | 175.90 (151.18, 220.89) | 0.78 |
|                                  | 1 | 131 | 182.55 (147.89, 221.42) |      |

\* SD: standard deviation, Q1: 25<sup>th</sup> percentile, Q3: 75<sup>th</sup> percentile, BMI: body mass index, SBP: systolic blood pressure, DBP: diastolic blood pressure, CIMT: carotid intima-media thickness, YEM: Young's Elastic Modulus, WHISTLER: Wheezing Illnesses Study Leidsche Rijn

† N = 237, 0: n = 98 (not participating) / 1: n = 139 (participating)

§ P values for independent samples t-test (parameters with normal distribution), Mann-Whitney U test (parameters with non-normal distribution) and  $\chi^2$  test (categorical parameters)

## Supplemental Table S2. Vascular wall parameters\*

| Equations                                            |                                                                                |
|------------------------------------------------------|--------------------------------------------------------------------------------|
| $\Delta d$ (change in carotid diameter)              | $d_{\text{systolic}} - d$                                                      |
| MAP                                                  | $DBP + (SBP - DBP) / 3$                                                        |
| CF (conversion factor)                               | $(MAP - DBP) / d_{\text{mean}} - d$                                            |
| $\Delta p$ (carotid pulse pressure)                  | $CF * \Delta d$                                                                |
| $\Delta A$ (change in arterial cross-sectional area) | $\pi / 4 * [(d + \Delta d)^2 - d^2]$                                           |
| DC                                                   | $(\Delta A / A) / \Delta p = (2 \Delta d * d + \Delta d^2) / (\Delta p * d^2)$ |
| YEM                                                  | $(d / \text{common carotid IMT}) / DC$                                         |
| Abbreviations                                        |                                                                                |
| $d_{\text{systolic}}$                                | Mean end-systolic carotid lumen diameter ( $\mu\text{m}$ )                     |
| D                                                    | Mean end-diastolic carotid lumen diameter ( $\mu\text{m}$ )                    |
| A                                                    | Carotid cross-sectional area ( $\mu\text{m}^2$ )                               |
| DC                                                   | Carotid distensibility coefficient ( $\text{MPa}^{-1}$ )                       |
| YEM                                                  | Carotid elasticity, Young's Modulus (kPa)                                      |
| Common carotid IMT                                   | Carotid intima-media thickness (mm)                                            |
| SBP                                                  | Systolic blood pressure in brachial artery (mmHg)                              |
| DBP                                                  | Diastolic blood pressure in brachial artery (mmHg)                             |
| MAP                                                  | Mean arterial pressure in brachial artery (mmHg)                               |

\*Reproduced from: "Eikendal AL, den Ruijter HM, Uiterwaal CS, Pasterkamp G, Hofer IE, de Kleijn DP, et al. Extracellular vesicle protein CD14 relates to common carotid intima-media thickness in eight year old children. *Atherosclerosis*. 2014;236(2):270-6" with permission from Elsevier.
